# Supplementary material
Source: Royal Society of Chemistry journal article supplement (https://www.rsc.org/suppdata/dt/1998/2147/h801553.doc)
Supplement: Supplementary file 1 [file h801553.doc]

**The molecular structures of tetraborane(10) derivatives: *ab initio* calculations for H2MB3H8 (M = B, Al, Ga or In) and gas-phase electron diffraction study of H2GaB3H8**

Carole A. Morrison,*a* Bruce A. Smart,*a* Paul T. Brain,*a* Colin R. Pulham,*a* David W. H. Rankin**,a* and Anthony J. Downs*b*

*aDepartment of Chemistry, University of Edinburgh, West Mains Road,*

*Edinburgh, EH9 3JJ, U.K.*

*b Inorganic Chemistry Laboratory, University of Oxford, South Parks Road, Oxford, OX1 3QR, U.K.*

**Electronic Supplementary Information**

**Table 1** *Ab initio* molecular geometries and energies for B4H10 (*r*e/pm, </)

| Parameter *a* | Basis set/level of theory | | | | | | | |
| --- | --- | --- | --- | --- | --- | --- | --- | --- |
|  | 6-31G*/SCF*b* | 6-311G**/SCF | 6-31G*/MP2*b* | 6-31+G*/MP2*b* | 6-31G*/MP3 | 6-31G*/MP4 | 6-31G*/QCISD | 6-311G**/MP2*c* |
| *r*[B(1)-B(3)] | 174.1 | 174.4 | 171.8 | 171.9 | 172.1 | 172.0 | 172.1 | 173.0 |
| *r*[B(1)-B(4)] | 189.3 | 189.8 | 184.0 | 184.0 | 184.7 | 185.0 | 185.1 | 185.6 |
| *r*[B(1)-H(1,4)] | 124.7 | 125.3 | 125.3 | 125.3 | 125.4 | 125.5 | 125.5 | 125.6 |
| *r*[B(4)-H(1,4)] | 142.3 | 142.9 | 141.2 | 141.2 | 141.3 | 141.4 | 141.5 | 141.9 |
| *r*[B(1)-H(1)] | 118.1 | 118.0 | 118.6 | 118.6 | 118.7 | 118.9 | 119.0 | 118.2 |
| *r*[B(4)-H(4)*endo* ] | 118.8 | 118.8 | 119.7 | 119.8 | 119.7 | 119.9 | 120.0 | 119.5 |
| *r*[B(4)-H(4)*exo* ] | 118.4 | 118.4 | 119.2 | 119.3 | 119.3 | 119.4 | 119.5 | 118.9 |
| B(1)B(2)B(3) | 54.8 | 54.7 | 55.7 | 55.7 | 55.5 | 55.4 | 55.4 | 55.6 |
| B(3)B(1)H(1) | 115.6 | 115.4 | 115.0 | 114.9 | 115.2 | 115.2 | 115.2 | 114.7 |
| H(4)*endo* B(4)H(4)*exo* | 120.2 | 120.2 | 118.7 | 118.6 | 118.7 | 118.8 | 118.8 | 119.7 |
| BH2 tilt | -2.6 | -2.8 | -2.2 | -2.2 | -2.3 | -2.3 | -2.3 | -1.8 |
| Butterfly angle | 116.9 | 117.2 | 117.4 | 117.3 | 117.3 | 117.2 | 117.1 | 116.5 |
| H(1,4) dip | 7.9 | 7.8 | 8.8 | 8.7 | 8.5 | 8.3 | 8.2 | 8.4 |
| Energy/Hartree | -104.45702 | -104.485521 | -104.843578 | -104.84777 | -104.843521 | -104.897149 | -104.897146 | -104.954428 |

*a* For definition of parameters, see the text. Note that B(4) = B(2) for B4H10; parameters are quoted relative to B(4) for ease of comparison with other compounds in the series. *b*  From ref. 4. *c* Coordinates are given in Table 5 of the Electronic Supplementary Information.

**Table 2** *Ab initio* molecular geometries and energies for H2AlB3H8 (*r*e/pm, </)

| Parameter *a* | Basis set/level of theory | | | | | | | | |
| --- | --- | --- | --- | --- | --- | --- | --- | --- | --- |
|  | 3-21G*/SCF | 6-31G*/SCF | 6-311G**/SCF | 6-31G*/MP2 | 6-31+G*/MP2 | 6-31G*/MP3 | 6-31G*/MP4 | 6-31G*/QCISD | 6-311G**/MP2*b* |
| *r*[B(1)-B(3)] | 178.1 | 179.2 | 179.4 | 177.1 | 177.2 | 177.4 | 177.3 | 177.3 | 178.1 |
| *r*[B(1)-B(4)] | 189.6 | 189.2 | 189.8 | 183.5 | 183.5 | 184.4 | 184.6 | 184.7 | 185.0 |
| *r*[B(1)…Al(2)] | 231.4 | 230.8 | 230.3 | 227.1 | 227.3 | 227.1 | 227.3 | 227.5 | 228.0 |
| *r*[B(1)-H(1,4)] | 125.0 | 124.9 | 125.4 | 125.3 | 125.4 | 125.5 | 125.6 | 125.6 | 125.6 |
| *r*[B(4)-H(1,4)] | 142.3 | 141.6 | 142.2 | 140.9 | 140.9 | 140.9 | 141.0 | 141.0 | 141.5 |
| *r*[B(1)-H(1,2)] | 124.5 | 124.8 | 125.2 | 124.3 | 124.3 | 124.5 | 124.8 | 124.9 | 124.3 |
| *r*[Al(2)-H(1,2)] | 179.9 | 180.7 | 180.6 | 181.8 | 181.7 | 181.7 | 181.7 | 181.6 | 181.3 |
| *r*[B(1)-H(1)] | 118.2 | 118.5 | 118.4 | 118.9 | 119.0 | 119.1 | 119.2 | 119.3 | 118.6 |
| *r*[B(4)-H(4)*endo* ] | 118.4 | 118.8 | 118.8 | 119.6 | 119.7 | 119.7 | 119.9 | 119.9 | 119.4 |
| *r*[B(4)-H(4)*exo* ] | 118.3 | 118.6 | 118.6 | 119.4 | 119.5 | 119.5 | 119.6 | 119.7 | 119.2 |
| *r*[Al(2)-H(2)*endo* ] | 157.4 | 157.1 | 156.9 | 157.9 | 157.8 | 158.2 | 158.4 | 158.6 | 156.6 |
| *r*[Al(2)-H(2)*exo* ] | 157.3 | 157.0 | 156.7 | 157.8 | 157.7 | 158.1 | 158.3 | 158.4 | 156.5 |
| B(1)B(2)B(3) | 56.0 | 56.5 | 56.4 | 57.7 | 57.7 | 57.5 | 57.4 | 57.4 | 57.6 |
| B(1)Al(2)B(3) | 45.3 | 45.7 | 45.8 | 45.9 | 45.9 | 46.0 | 45.9 | 45.9 | 46.0 |
| B(3)B(1)H(1) | 113.5 | 113.3 | 113.2 | 112.2 | 112.2 | 112.5 | 112.6 | 112.6 | 112.1 |
| H(4)*endo* B(4)H(4)*exo* | 120.8 | 119.8 | 119.9 | 118.2 | 118.2 | 118.2 | 228.2 | 118.3 | 119.0 |
| H(2)*endo* Al(2)H(2)*exo* | 128.4 | 128.0 | 127.2 | 128.0 | 127.9 | 127.9 | 127.9 | 128.0 | 128.2 |
| AlH2 tilt | -2.6 | -3.1 | -3.2 | -2.6 | -2.5 | -2.7 | -2.6 | -2.6 | -2.6 |
| BH2 tilt | 0.2 | 0.3 | 0.6 | 0.6 | 0.8 | 0.5 | 0.5 | 0.6 | 1.6 |
| Butterfly angle | 116.2 | 117.1 | 116.8 | 117.6 | 117.6 | 117.6 | 117.5 | 117.4 | 116.0 |
| H(1,2) dip | 10.0 | 10.1 | 10.0 | 11.4 | 11.3 | 11.2 | 11.0 | 10.9 | 10.6 |
| H(1,4) dip | 1.0 | 0.5 | 1.0 | 1.0 | 1.2 | 0.9 | 1.0 | 1.0 | 2.4 |
| Energy/Hartree | -319.981598 | -321.705502 | -321.748494 | -322.055495 | -322.060381 | -322.102248 | -322.111606 | -322.114270 | -322.184229 |

*a*  For definition of parameters see the text. *b* Coordinates are given in Table 6 of the Electronic Supplementary Information.

**Table 3** *Ab initio* molecular geometries and energies for H2GaB3H8 (*r*e/pm, </)

| Parameter *a* | Basis set/level of theory | | | | |
| --- | --- | --- | --- | --- | --- |
|  | 3-21G*/SCF | 6-31G*/SCF | 6-311G**/SCF | 6-31G*/MP2*b* | 6-311G**/MP2*b,c* |
| *r*[B(1)-B(3)] | 178.8 | 179.6 | 180.0 | 177.7 | 178.4 |
| *r*[B(1)-B(4)] | 187.8 | 191.8 | 188.3 | 184.7 | 184.6 |
| *r*[B(1)…Ga(2)] | 236.0 | 227.6 | 235.5 | 224.5 | 229.1 |
| *r*[B(1)-H(1,4)] | 124.7 | 125.6 | 125.1 | 125.7 | 125.6 |
| *r*[B(4)-H(1,4)] | 142.8 | 138.5 | 143.3 | 139.0 | 141.8 |
| *r*[B(1)-H(1,2)] | 124.4 | 124.3 | 125.7 | 124.2 | 125.0 |
| *r*[Ga(2)-H(1,2)] | 186.2 | 188.2 | 184.1 | 188.4 | 182.8 |
| *r*[B(1)-H(1)] | 118.2 | 118.5 | 118.4 | 118.9 | 118.6 |
| *r*[B(4)-H(4)*endo*] | 118.4 | 118.8 | 118.9 | 119.6 | 119.5 |
| *r*[B(4)-H(4)*exo*] | 118.4 | 118.7 | 118.6 | 119.4 | 119.2 |
| *r*[Ga(2)-H(2)*endo*] | 156.3 | 155.5 | 155.5 | 156.3 | 153.5 |
| *r*[Ga(2)-H(2)*exo*] | 156.1 | 155.5 | 155.4 | 156.2 | 153.3 |
| B(1)B(4)B(3) | 56.8 | 55.8 | 57.1 | 57.5 | 57.8 |
| B(1)Ga(2)B(3) | 44.5 | 46.5 | 45.0 | 46.6 | 45.8 |
| B(3)B(1)H(1) | 112.3 | 112.1 | 112.5 | 111.1 | 111.8 |
| H(4)*endo*B(4)H(4)*exo* | 120.7 | 119.6 | 119.7 | 117.9 | 119.0 |
| H(2)*endo*Ga(2)H(2)*exo* | 130.2 | 129.5 | 130.4 | 129.5 | 131.4 |
| GaH2 tilt | -4.1 | -2.9 | -3.1 | -2.4 | -2.5 |
| BH2 tilt | 2.7 | 2.7 | -0.1 | 2.6 | 0.8 |
| Butterfly angle | 118.0 | 115.6 | 117.4 | 116.2 | 116.7 |
| H(1,2) dip | 13.2 | 10.2 | 10.0 | 11.5 | 10.5 |
| H(1,4) dip | 3.0 | 3.3 | 0.1 | 3.3 | 0.3 |
| Energy/Hartree | -1993.185615 | -2001.015642 | -2003.018018 | -2001.383078 | -2003.624498 |

*a* For definition of parameters see the text. *b*For the method of electron correlation used for Ga see the text. *c* Coordinates are given in Table 7 of the Electronic Supplementary Information.

**Table 4** *Ab initio* molecular geometries and energies for H2InB3H8 (*r*e/pm, </)

| Parameter *a* | Basis set/level of theory | | | | |
| --- | --- | --- | --- | --- | --- |
|  | 3-21G*/SCF | 6-31G*/SCF*b* | 6-311G**/SCF*b* | 6-31G*/MP2*b,c* | 6-311G**/MP2*b,c,d* |
| *r*[B(1)-B(3)] | 179.3 | 181.4 | 181.6 | 178.8 | 179.6 |
| *r*[B(1)-B(4)] | 188.2 | 185.9 | 186.7 | 182.5 | 183.9 |
| *r*[B(1)…In(2)] | 259.5 | 261.9 | 260.3 | 252.5 | 253.1 |
| *r*[B(1)-H(1,4)] | 125.4 | 124.3 | 125.0 | 125.3 | 125.7 |
| *r*[B(4)-H(1,4)] | 142.0 | 144.3 | 144.5 | 141.6 | 142.1 |
| *r*[B(1)-H(1,2)] | 124.7 | 125.5 | 125.8 | 124.8 | 124.8 |
| *r*[In(2)-H(1,2)] | 205.1 | 203.8 | 203.5 | 204.6 | 203.2 |
| *r*[B(1)-H(1)] | 118.4 | 118.6 | 118.6 | 119.1 | 118.8 |
| *r*[B(4)-H(4)*endo*] | 118.6 | 119.0 | 119.0 | 119.8 | 119.6 |
| *r*[B(4)-H(4)*exo*] | 118.5 | 118.7 | 118.7 | 119.6 | 119.3 |
| *r*[In(2)-H(2)*endo*] | 175.2 | 174.8 | 174.6 | 174.3 | 172.5 |
| *r*[In(2)-H(2)*exo*] | 175.1 | 174.8 | 174.5 | 174.2 | 172.4 |
| B(1)B(2)B(3) | 56.9 | 58.4 | 58.2 | 58.7 | 58.5 |
| B(1)In(2)B(3) | 40.4 | 40.5 | 40.8 | 41.5 | 41.6 |
| B(3)B(1)H(1) | 112.6 | 111.7 | 111.6 | 111.1 | 111.2 |
| H(4)*endo*B(4)H(4)*exo* | 120.2 | 119.3 | 119.3 | 117.8 | 118.7 |
| H(2)*endo*In(2)H(2)*exo* | 133.4 | 133.2 | 132.8 | 133.6 | 134.1 |
| InH2 tilt | -3.1 | -3.4 | -3.5 | -3.0 | -2.8 |
| BH2 tilt | 2.0 | 0.8 | 0.9 | 1.7 | 1.8 |
| Butterfly angle | 116.9 | 118.4 | 118.5 | 119.4 | 117.9 |
| H(1,2) dip | 11.8 | 11.7 | 11.9 | 13.9 | 12.9 |
| H(1,4) dip | 3.5 | 1.6 | 1.9 | 2.2 | 3.0 |
| Energy/Hartree | -5794.406385 | -5819.936690 | -5819.967864 | -5820.378876 | *-5820.433682* |

*a* For definition of parameters see the text. *b* For In basis set see the text. *c* For the method of electron correlation used for In see the text.

*d* Coordinates are given in Table 8 of the Electronic Supplementary Information.

**Table 5** Cartesian coordinates (pm) obtained for B4H10 from the 6-311G**/MP2 *ab initio* calculation

|  |  | x | y | z |
| --- | --- | --- | --- | --- |
| Cage | B(1) | -86.6 | 0.0 | -46.9 |
|  | B(2) | 0.0 | -139.7 | 39.5 |
|  | B(3) | 86.6 | 0.0 | -46.9 |
|  | B(4) | 0.0 | 1.39.7 | 39.5 |
| Bridge | H(1,2) | -132.8 | -91.2 | 26.0 |
|  | H(2,3) | 132.8 | -91.2 | 26.0 |
|  | H(3,4) | 132.8 | 91.2 | 26.0 |
|  | H(1,4) | -132.8 | 91.2 | 26.0 |
| Terminal | H(1) | 136.1 | 0.0 | -154.2 |
|  | H(3) | -136.1 | 0.0 | -154.2 |
|  | H(2)*endo* | 0.0 | 140.1 | 158.9 |
|  | H(2)*exo* | 0.0 | 243.0 | -19.6 |
|  | H(4)*endo* | 0.0 | -140.1 | 158.9 |
|  | H(4)*exo* | 0.0 | -243.0 | -19.6 |

**Table 6** Cartesian coordinates (pm) obtained for H2AlB3H8 from the 6-311G**/MP2 *ab initio* calculation

|  |  | x | y | z |
| --- | --- | --- | --- | --- |
| Cage | B(1) | 89.1 | -54.3 | 56.2 |
|  | Al(2) | 0.0 | 139.5 | -24.3 |
|  | B(3) | -89.1 | -54.3 | 56.2 |
|  | B(4) | 0.0 | -175.9 | -51.0 |
| Bridge | H(1,2) | 148.6 | 38.2 | -1.7 |
|  | H(2,3) | -148.6 | 38.2 | -1.7 |
|  | H(3,4) | -134.1 | -144.9 | -18.3 |
|  | H(1,4) | 134.1 | -144.9 | -18.3 |
| Terminal | H(1) | 133.8 | -72.2 | 164.6 |
|  | H(3) | -133.8 | -72.2 | 164.6 |
|  | H(2)*endo* | 0.0 | 155.7 | -180.1 |
|  | H(2)*exo* | 0.0 | 251.9 | 84.6 |
|  | H(4)*endo* | 0.0 | -150.1 | -167.6 |
|  | H(4)*exo* | 0.0 | -290.2 | -17.2 |

**Table 7** Cartesian oordinates (pm) obtained for H2GaB3H8 from the 6-311G**/MP2 *ab initio* calculation*a*

|  |  | x | y | z |
| --- | --- | --- | --- | --- |
| Cage | B(1) | 89.2 | -100.3 | 62.8 |
|  | Ga(2) | 0.0 | 95.6 | -15.8 |
|  | B(3) | -89.2 | -100.3 | 62.8 |
|  | B(4) | 0.0 | -221.6 | -44.1 |
| Bridge | H(1,2) | 149.7 | -7.0 | 5.8 |
|  | H(2,3) | -149.7 | -7.0 | 5.8 |
|  | H(3,4) | -134.6 | -188.4 | -14.2 |
|  | H(1,4) | 134.6 | -188.4 | -14.2 |
| Terminal | H(1) | 133.2 | -119.3 | 171.3 |
|  | H(3) | -133.2 | -119.3 | 171.3 |
|  | H(2)*endo* | 0.0 | 108.8 | -168.7 |
|  | H(2)*exo* | 0.0 | 201.5 | 095.0 |
|  | H(4)*endo* | 0.0 | -197.3 | -161.1 |
|  | H(4)*exo* | 0.0 | -335.4 | -8.7 |

*a* For method of electron correlation used for Ga, see the text

**Table 8** Cartesian coordinates (pm) obtained for H2InB3H8 from the 6-311G**/MP2 *ab initio* calculation.*a,b*

|  |  | x | y | z |
| --- | --- | --- | --- | --- |
| Cage | B(1) | -42.8 | -150.9 | 89.4 |
|  | In(2) | 0.0 | 81.4 | 0.0 |
|  | B(3) | -42.8 | -150.9 | -89.4 |
|  | B(4) | 79.7 | -252.4 | 0.0 |
| Bridge | H(1,2) | -0.6 | -53.0 | 154.2 |
|  | H(2,3) | -0.6 | -53.0 | -154.2 |
|  | H(3,4) | 44.6 | -228.2 | -135.0 |
|  | H(1,4) | 44.6 | -228.2 | 135.0 |
| Terminal | H(1) | -147.9 | -187.3 | 132.2 |
|  | H(3) | -147.9 | -187.3 | -132.2 |
|  | H(2)*endo* | 166.9 | 129.4 | 0.0 |
|  | H(2)*exo* | -150.9 | 169.7 | 0.0 |
|  | H(4)*endo* | 191.8 | -210.1 | 0.0 |
|  | H(4)*exo* | 64.8 | -371.0 | 0.0 |

*a* For method of electron correlation used for In, see the text.*b* For In basis set used, see the text.

**Table 9** Final coordinates (pm) from the SARACEN study of H2GaB3H8 (*r* structure)

| Fragment | Atom | | x | y | z |
| --- | --- | --- | --- | --- | --- |
| Cage | | B(1) | 0 | -89.0 | 0 |
|  | | Ga(2) | 181.8 | 0 | 111.3 |
|  | | B(3) | 0 | 89.0 | 0 |
|  | | B(4) | -137.3 | 0 | 84.1 |
| Bridge | | H(1,2) | 82.3 | -146.1 | 71.3 |
|  | | H(2,3) | 82.3 | 146.1 | 71.3 |
|  | | H(3,4) | -97.8 | 134.6 | 60.5 |
|  | | H(1,4) | -97.8 | -134.6 | 60.5 |
| Terminal | | H(1) | 0 | -131.9 | -108.4 |
|  | | H(3) | 0 | 131.9 | -108.4 |
|  | | H(2)*endo* | 170.1 | 0 | 260.2 |
|  | | H(2)*exo* | 301.6 | 0 | 22.4 |
|  | | H(4)*endo* | -133.7 | 0 | 201.1 |
|  | | H(4)*exo* | -241.0 | 0 | 30.2 |

**Table 10** Least-squares correlation matrix (x100) for the SARACEN study of H2GaB3H8*a*

|  | *p*2 | *p*4 | *u*9 | *u*10 | *u*13 | *u*14 | *u*15 | *k*1 | *k*2 |
| --- | --- | --- | --- | --- | --- | --- | --- | --- | --- |
| *p*1 |  | -88 | 54 | 54 |  |  |  |  |  |
| *p*4 |  |  | -70 | -70 |  |  |  |  |  |
| *p*18 | -53 |  |  |  | -56 | -56 |  | -51 |  |
| *u*9 |  |  |  | 93 |  |  |  |  |  |
| *u*12 |  |  |  |  | 65 | 65 |  | 84 | 72 |
| *u*13 |  |  |  |  |  | 95 | -63 | 72 | 59 |
| *u*14 |  |  |  |  |  |  | -63 | 72 | 59 |
| *k*1 |  |  |  |  |  |  |  |  | 74 |

*a* Only off-diagonal elements with absolute values >50% are shown.
